# Supplementary material
Source: PubMed Central journal article supplement (PMC6629165)
Supplement: jciinsight-4-124510-s240.pdf [file jciinsight-4-124510-s240.pdf]

1 **Supplemental Data:**

2 **Supplemental Table 1: List of Antibodies**

| Antibody                        | Concentration | Catalog number | Source                                                      |
|---------------------------------|---------------|----------------|-------------------------------------------------------------|
| Rabbit anti-Tuj1                | 1:10,000      | PRB-435P       | Covance;<br>RRID:AB_10063850                                |
| Goat anti-RET                   | 1:100         | Gt15002        | Neuromics;<br>RRID:AB_2179886                               |
| Rat anti-Somatostatin           | 1:500         | MAB354         | Millipore;<br>RRID:AB_2255365                               |
| Rabbit anti-Calretinin          | 1:5000        | AB5054         | Chemicon;<br>RRID:AB_2068506                                |
| Rabbit anti-VIP                 | 1:300         | 20077          | Immunostar;<br>RRID:AB_572270                               |
| Sheep anti-tyrosine hydroxylase | 1:500         | AB1542         | Chemicon; RRID: AB_90755                                    |
| ANNA-1 (HuC/D)                  | N/A           | N/A            | Kind gift from Dr. V. Lennon, Mayo Clinic; RRID: AB_2314657 |
| Rabbit anti caspase-3           | 1:250         | 9661S          | Cell Signal Technology; RRID: AB_2341188                    |

|                                   |       |          |                                        |
|-----------------------------------|-------|----------|----------------------------------------|
| Goat anti-Sox10                   | 1:200 | sc-17342 | Santa Cruz;<br>RRID:AB_2195374         |
| Alexa Fluor goat anti-human 647   | 1:400 | A21445   | Life Technologies;<br>RRID:AB_2535862  |
| AlexaFluor donkey anti-rabbit 488 | 1:400 | A21206   | Life Technologies;<br>RRID:AB_2535792  |
| AlexaFluor donkey anti-rabbit 594 | 1:400 | A21207   | Life Technologies;<br>RRID:AB_141637   |
| AlexaFluor donkey anti-rabbit 647 | 1:400 | A31573   | Life Technologies;<br>RRID:AB_2536183  |
| AlexaFluor donkey anti-rat 488    | 1:400 | A21208   | Life Technologies;<br>RRID:AB_141709   |
| AlexaFluor donkey anti-goat 594   | 1:400 | A11058   | Life Technologies;<br>RRID:AB_2534105  |
| AlexaFluor donkey anti-sheep 594  | 1:400 | A11016   | Life Technologies;<br>RRID:AB_10562537 |

3
